# Supplementary material for: New Layered Polythiophene-Silica Composite Through the Self-Assembly and Polymerization of Thiophene-Based Silylated Molecular Precursors
Source: PubMed Central journal article supplement (PMC6222596; doi:10.3390/molecules23102510), 2018-09-30
Supplement: molecules-23-02510-s001.pdf [file molecules-23-02510-s001.pdf]

## Supplementary materials for:

### ***Layered polythiophene-silica composite through self-assembly and polymerization of thiophene-based silylated molecular precursors***

Marie-José Zacca, Danielle Laurencin, Sébastien Richeter, Sébastien Clément\* and Ahmad Mehdi\*

Institut Charles Gerhardt, UMR 5253 - Université de Montpellier, CNRS, ENSCM – CC1701, Place Eugène Bataillon, F-34095 Montpellier Cedex 05, France.

#### **Table of contents:**

|                                                                                                         |     |
|---------------------------------------------------------------------------------------------------------|-----|
| ATR-FT-IR spectrum of <b>2</b>                                                                          | P.2 |
| <sup>1</sup> H NMR spectrum of <b>2</b> in CDCl <sub>3</sub>                                            | P.2 |
| <sup>13</sup> C{ <sup>1</sup> H} NMR spectrum of <b>2</b> in CDCl <sub>3</sub>                          | P.3 |
| ATR-FT-IR spectrum of <b>3</b>                                                                          | P.3 |
| <sup>1</sup> H NMR spectrum of <b>3</b> in CDCl <sub>3</sub>                                            | P.4 |
| <sup>13</sup> C{ <sup>1</sup> H} NMR spectrum of <b>3</b> in CDCl <sub>3</sub>                          | P.4 |
| <sup>1</sup> H NMR spectrum of <b>4</b> in CDCl <sub>3</sub>                                            | P.5 |
| <sup>13</sup> C{ <sup>1</sup> H} NMR spectrum of <b>4</b> in CDCl <sub>3</sub>                          | P.5 |
| <sup>29</sup> Si{ <sup>1</sup> H} NMR spectrum of <b>4</b> in CDCl <sub>3</sub>                         | P.6 |
| ATR-FT-IR spectra of hybrid materials <b>M4<sub>25</sub></b> (bottom) and <b>M4<sub>110</sub></b> (top) | P.6 |
| Colour evolution during the chemical polymerization of thiophene units in <b>M4<sub>110</sub></b>       | P.7 |
| <sup>13</sup> C CPMAS solid state NMR spectra of <b>M4<sub>110</sub></b> and <b>P4</b>                  | P.7 |
| TGA curve of lamellar polythiophene—silica hybrid material <b>P4</b>                                    | P.8 |

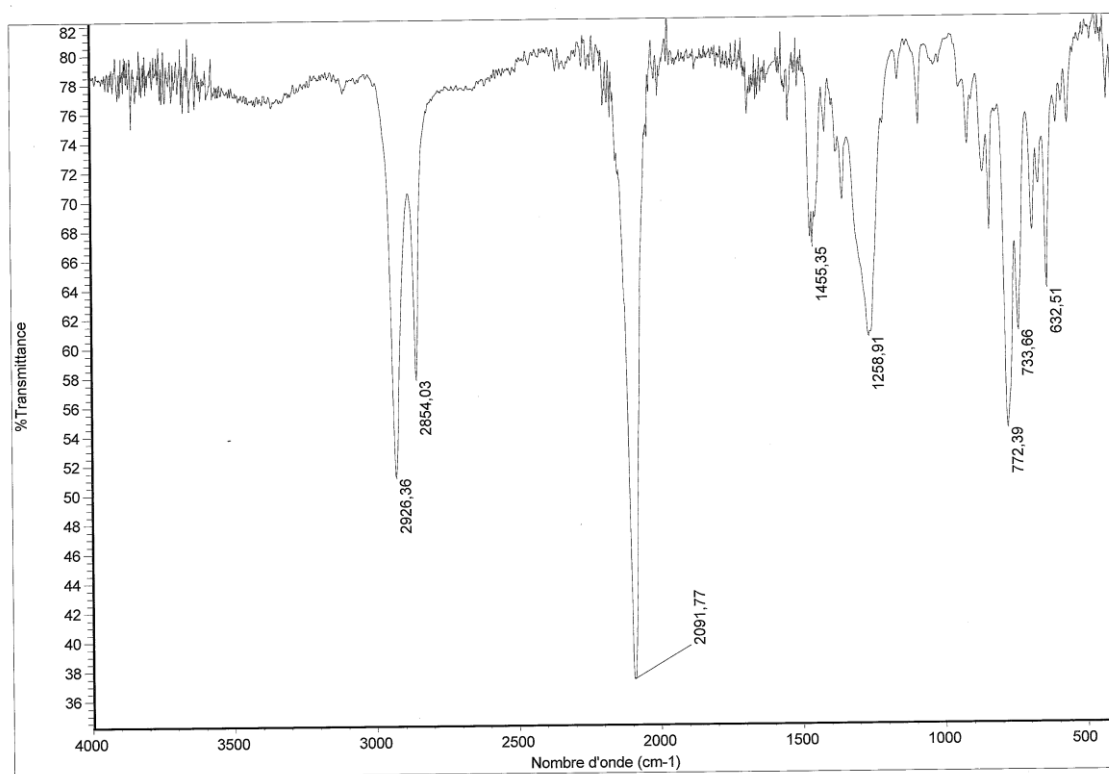

Figure S1 : ATR-FT-IR spectrum of 2.

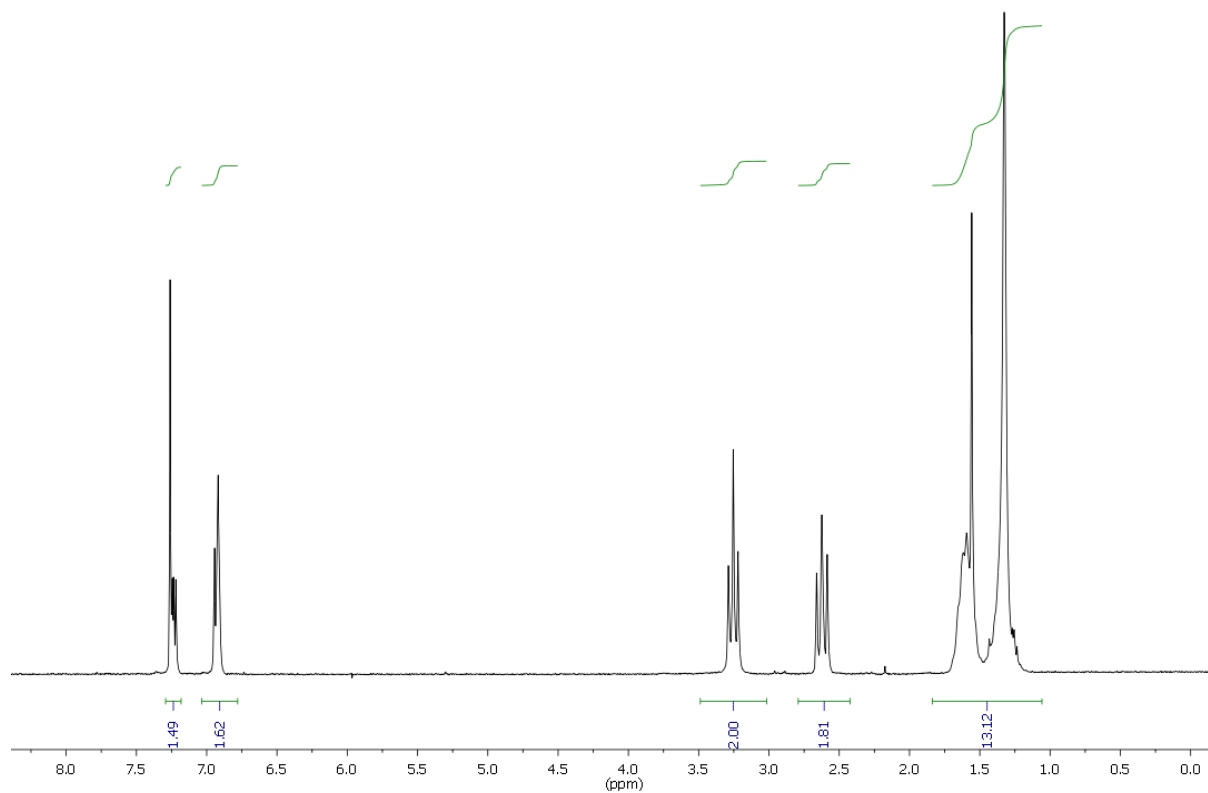

Figure S2 :  $^1\text{H}$  NMR spectrum of 2 in  $\text{CDCl}_3$ .

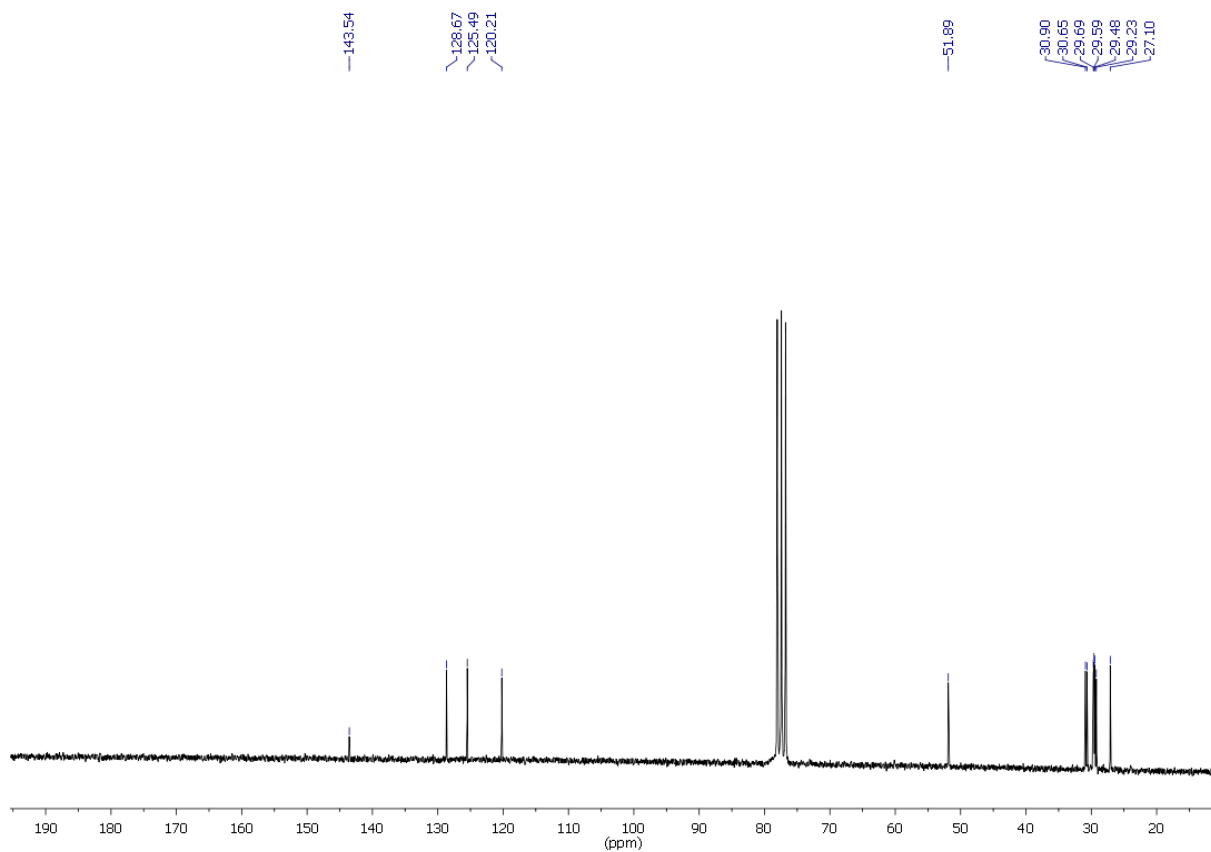

Figure S3 :  $^{13}\text{C}\{^1\text{H}\}$  NMR spectrum of **2** in  $\text{CDCl}_3$ .

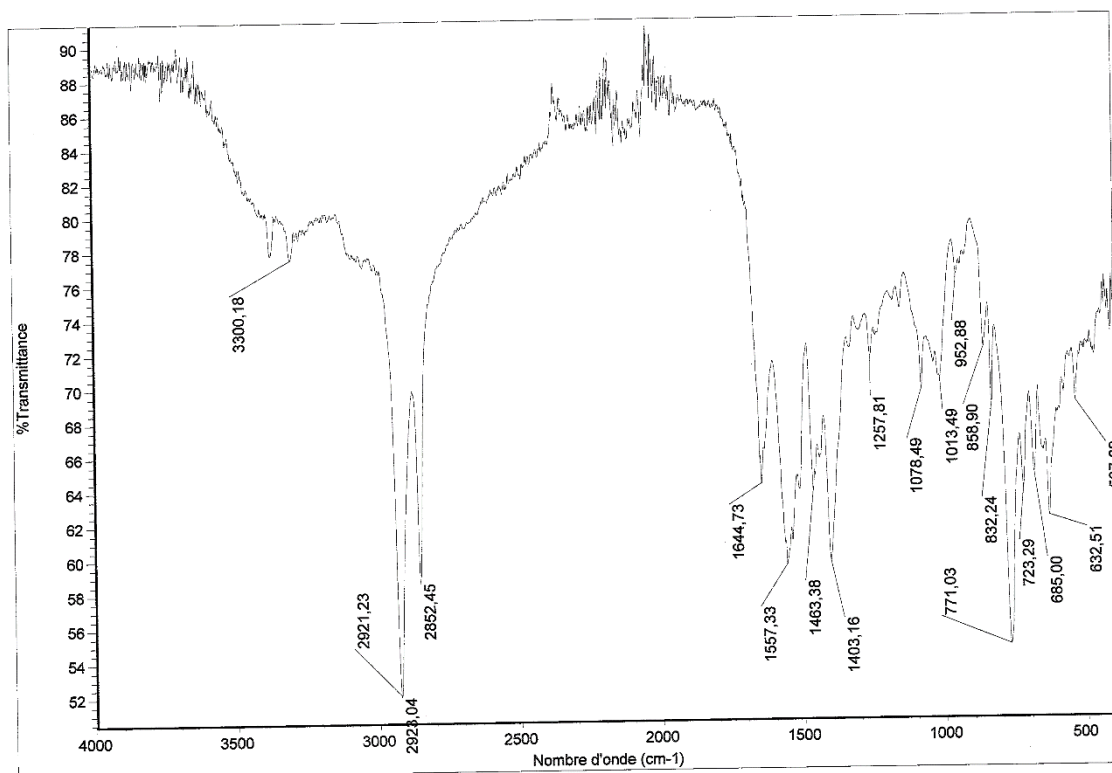

Figure S4: ATR-FT-IR spectrum of **3**.

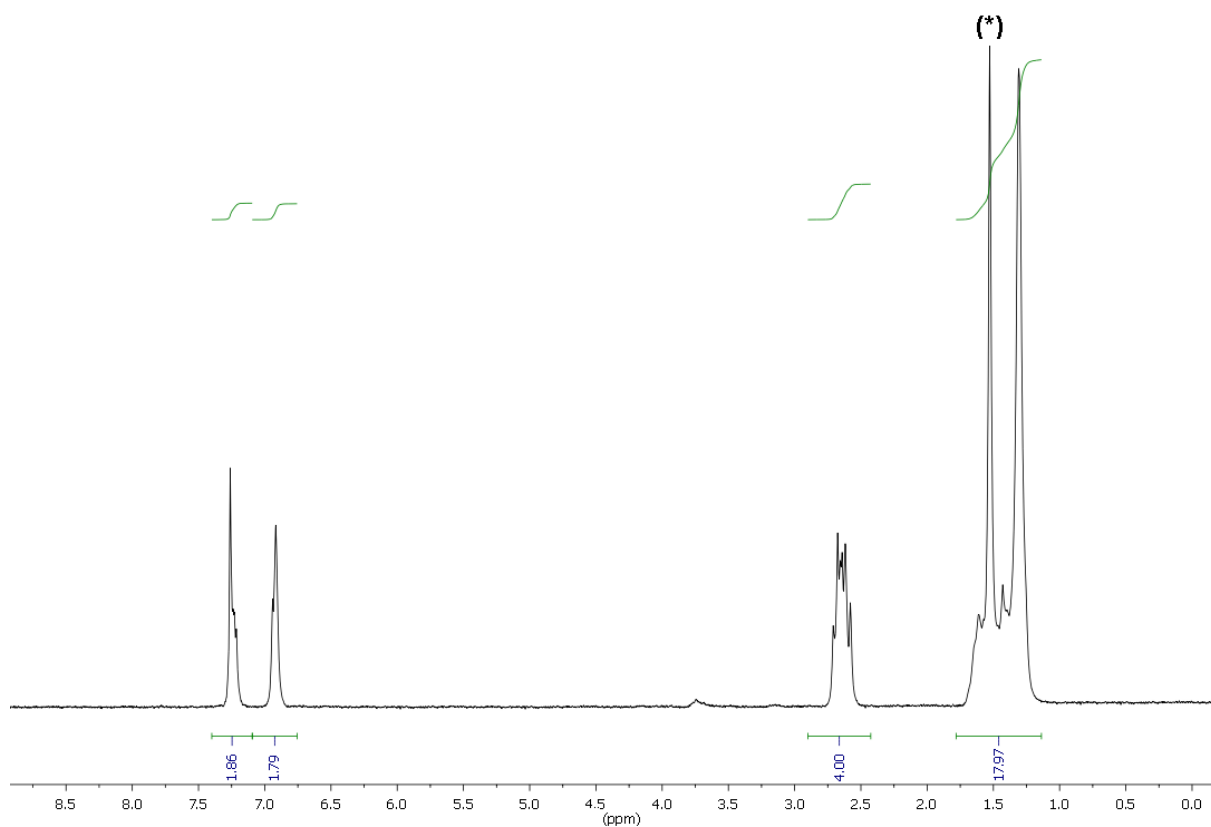

Figure S5 :  $^1\text{H}$  NMR spectrum of **3** in  $\text{CDCl}_3$ .(\*) Water.

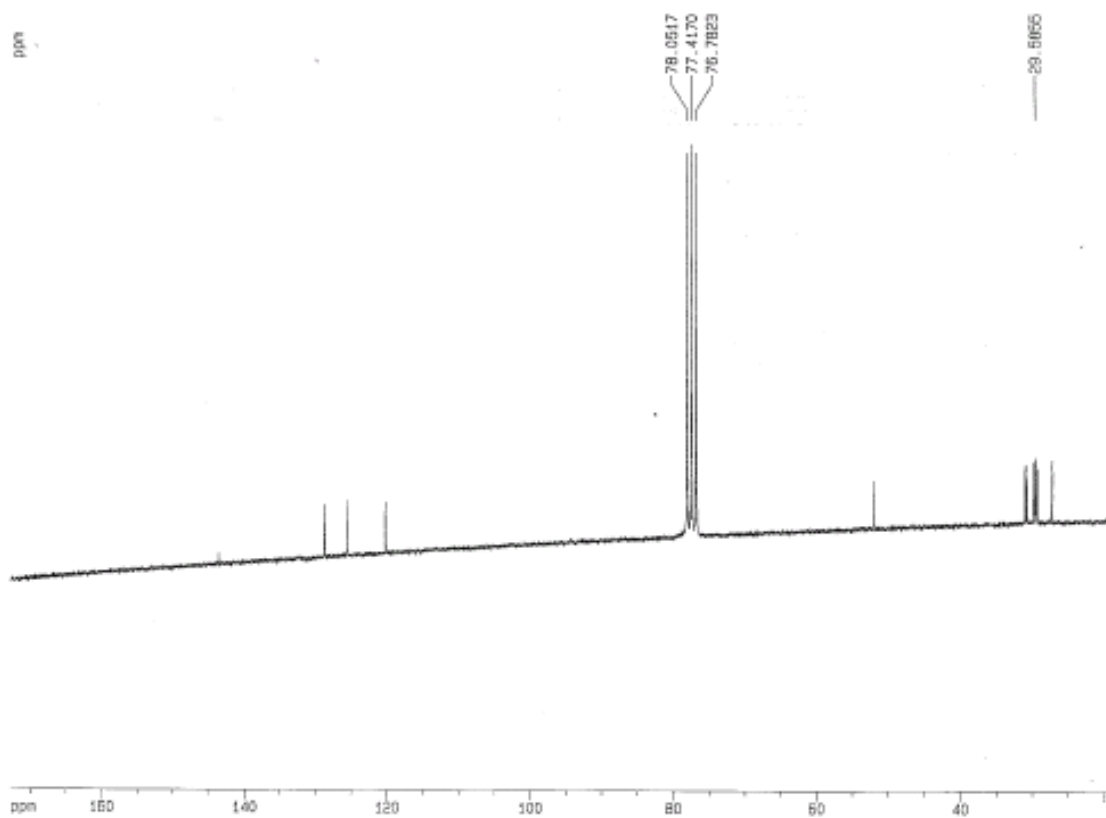

Figure S6 :  $^{13}\text{C}\{^1\text{H}\}$  NMR spectrum of **3** in  $\text{CDCl}_3$ .

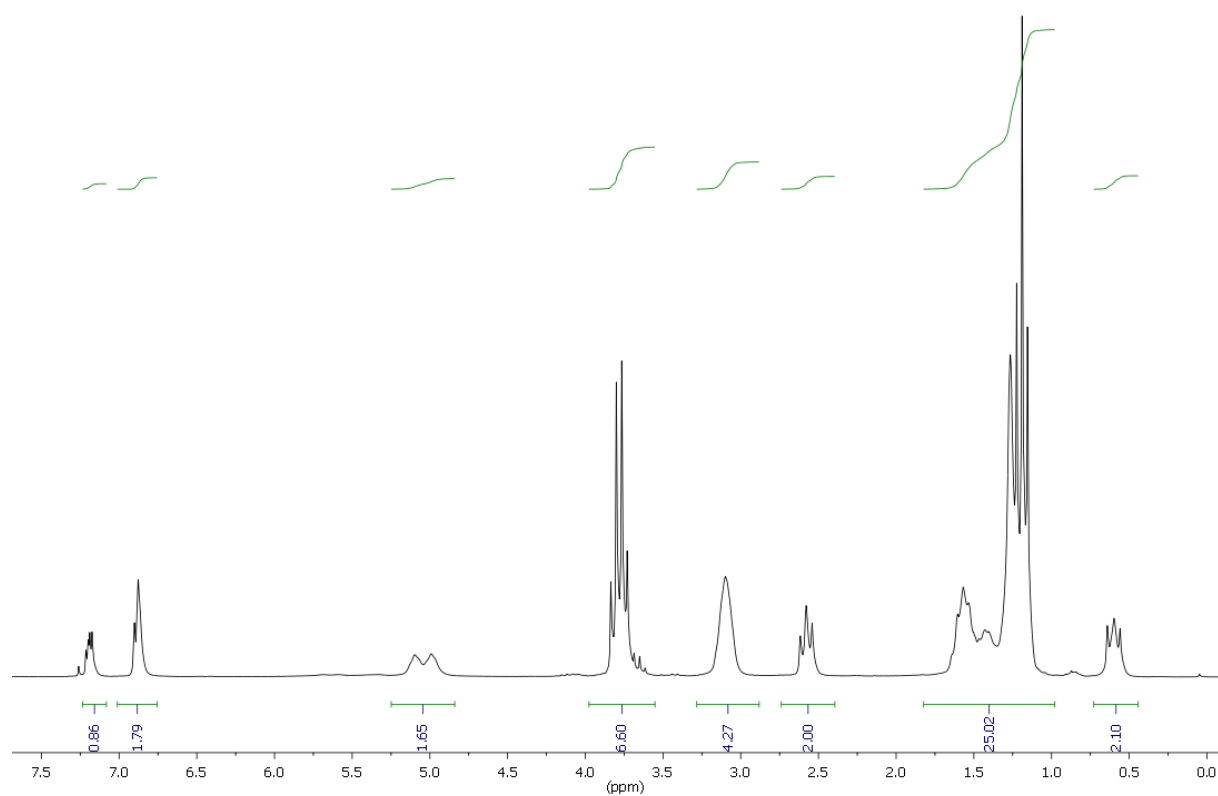

**Figure S7** :  $^1\text{H}$  NMR spectrum of **4** in  $\text{CDCl}_3$ .

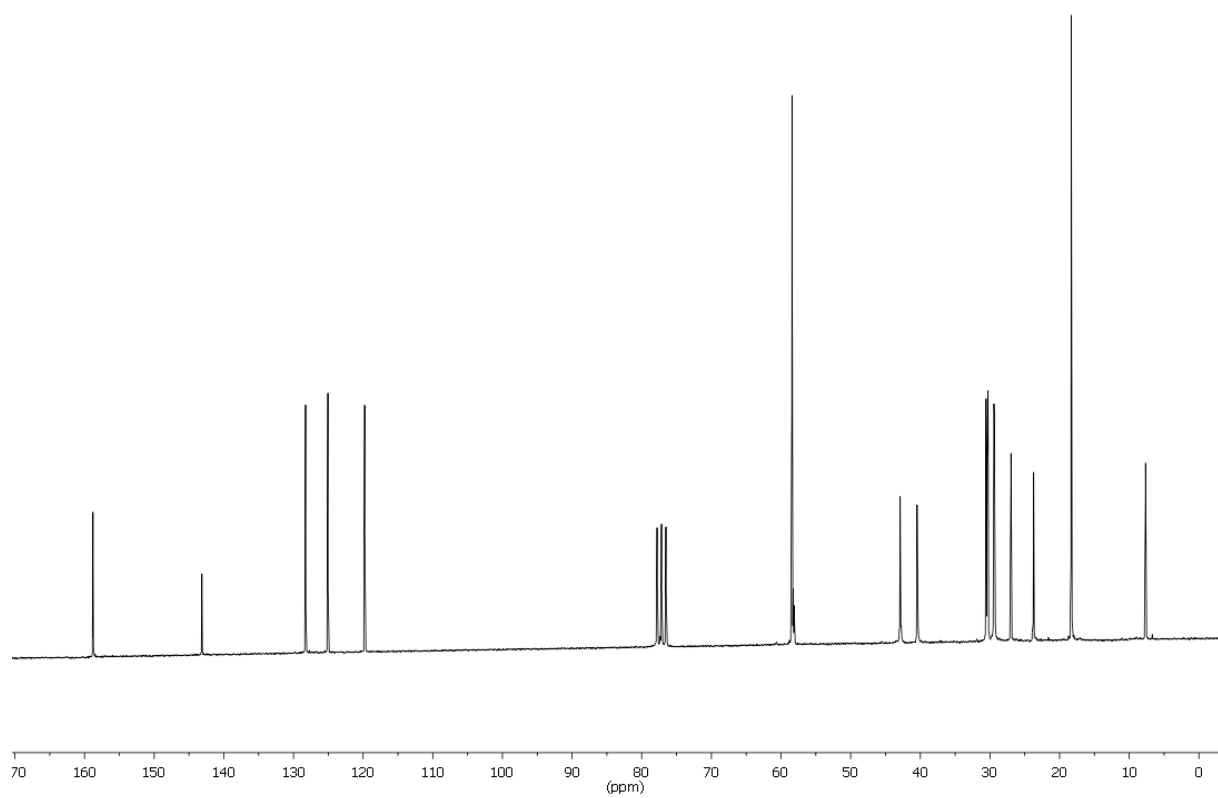

**Figure S8** :  $^{13}\text{C}\{^1\text{H}\}$  NMR spectrum of **4** in  $\text{CDCl}_3$ .

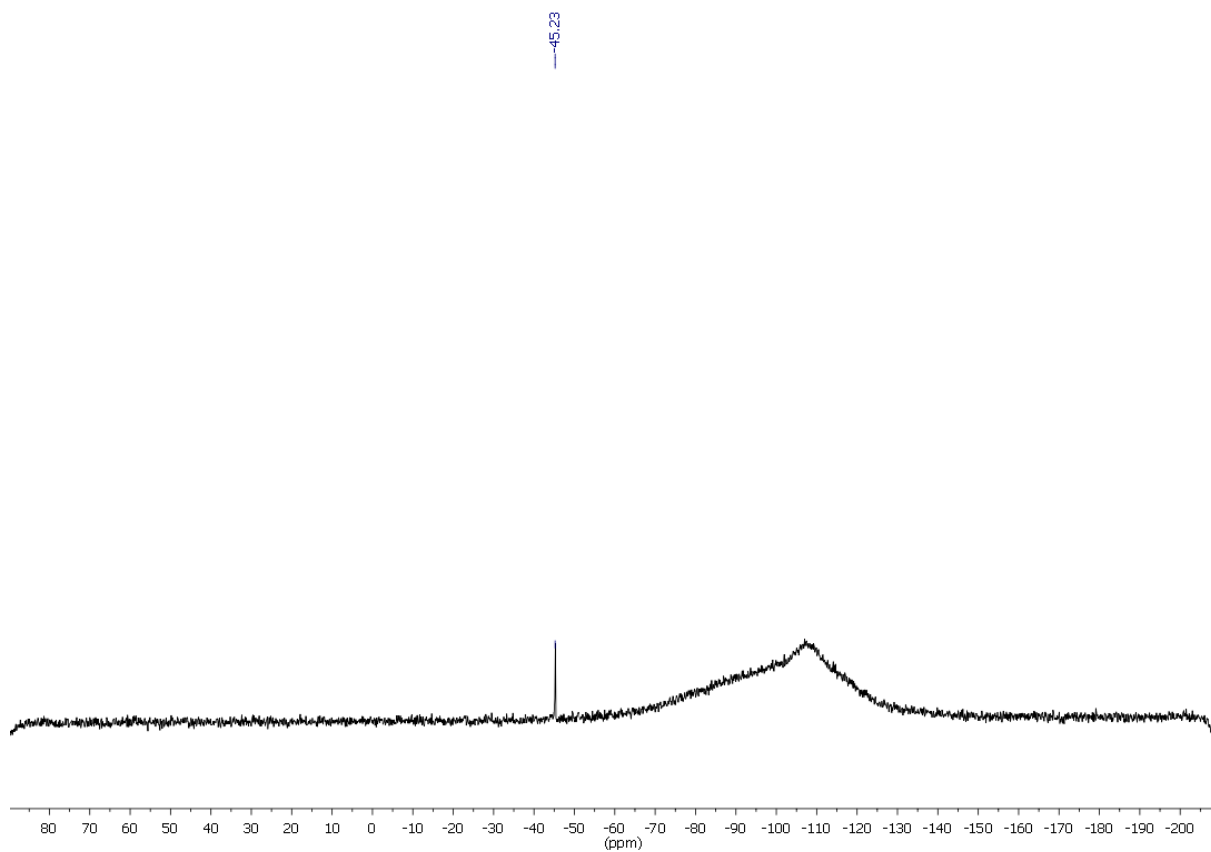

Figure S9 :  $^{29}\text{Si}\{^1\text{H}\}$  NMR spectrum of **4** in  $\text{CDCl}_3$ .

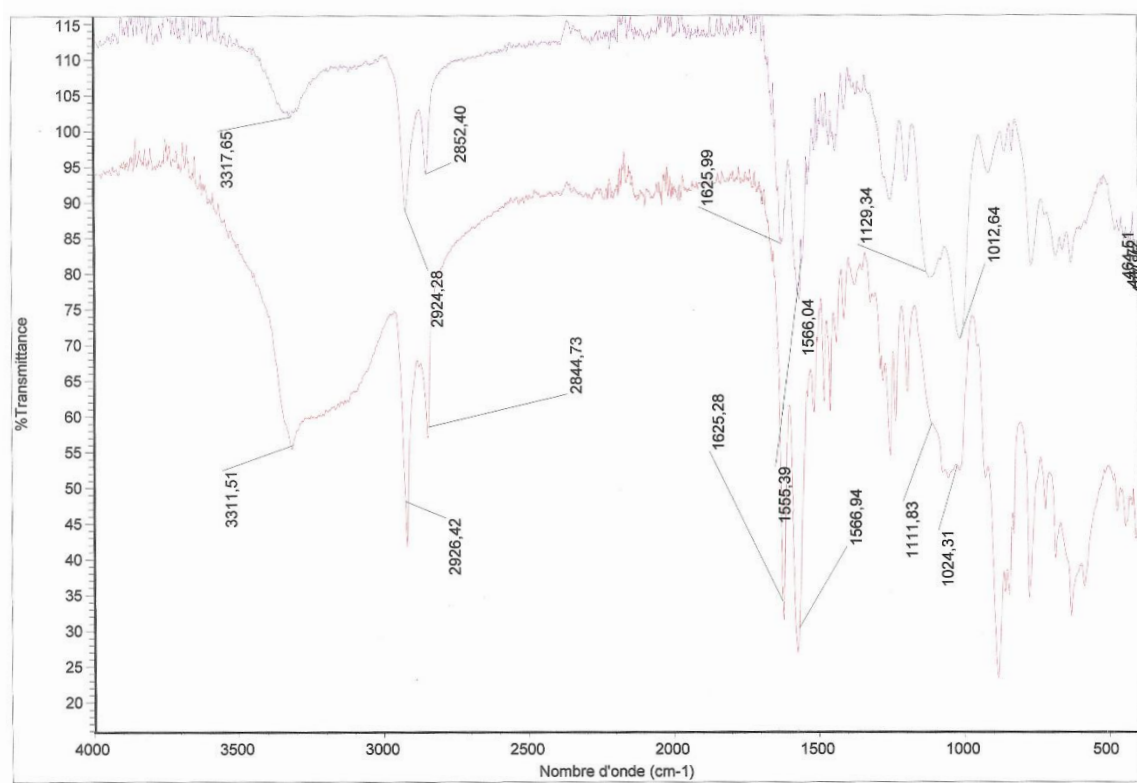

Figure S10: ATR-FT-IR spectra of hybrid materials **M4<sub>25</sub>** (bottom) and **M4<sub>110</sub>** (top).

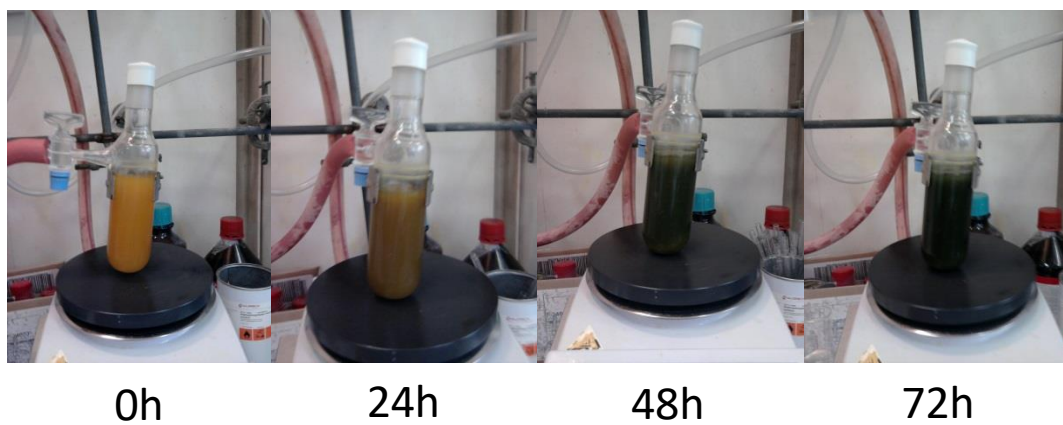

**Figure S11:** Colour evolution during the chemical polymerization of thiophene units in **M4<sub>110</sub>**.

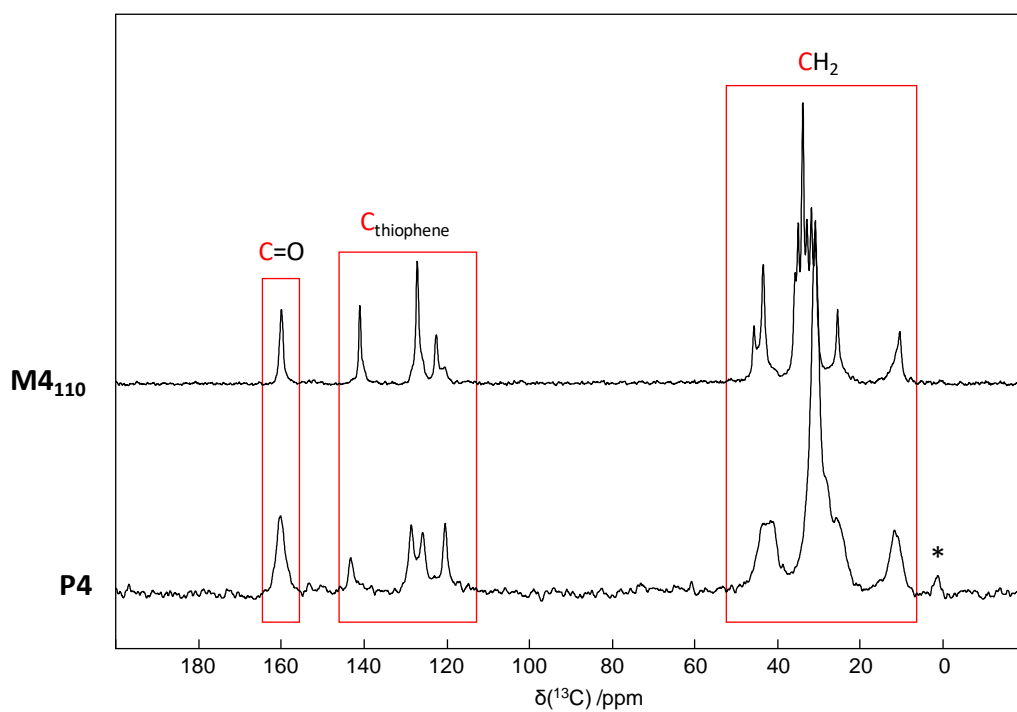

**Figure S12:** <sup>13</sup>C CPMAS solid state NMR spectra of **M4<sub>110</sub>** and **P4**.

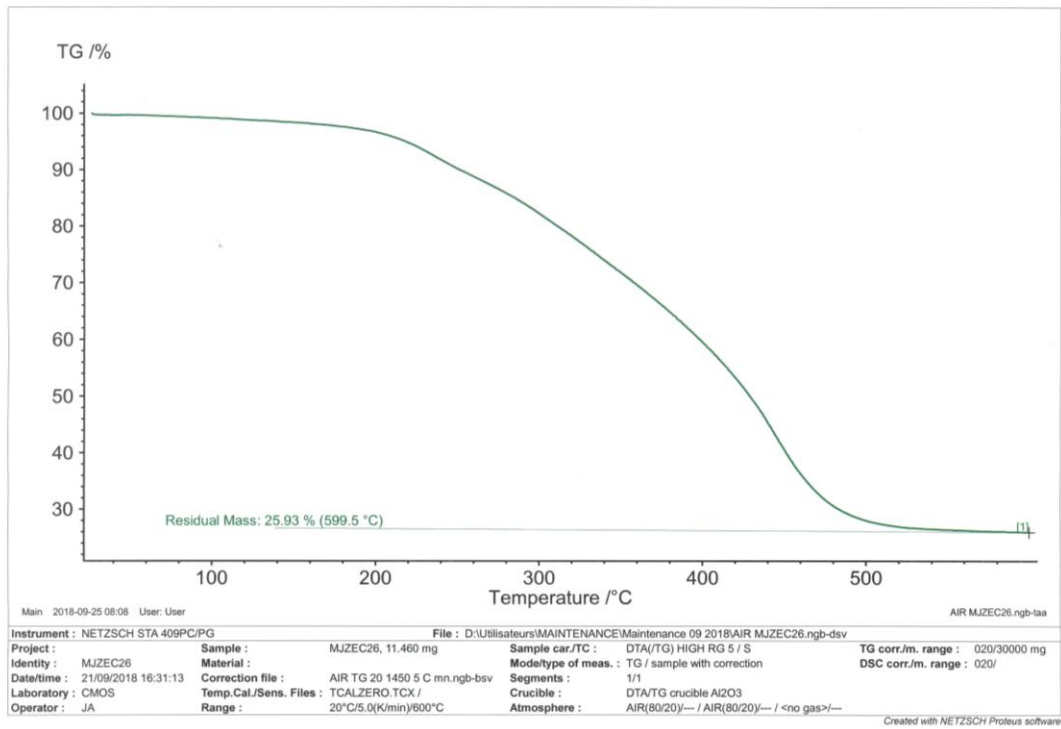

**Figure S13:** TGA curve of lamellar polythiophene-silica hybrid material **P4**.
